# Supplementary material
Source: HighWire-hosted journal article supplement (http://hw-f5-jim.highwire.org/highwire/filestream/141390/field_highwire_adjunct_files/0/AFMR_Membership_Flyer_70_5.pdf)

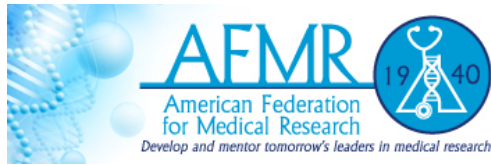

**AFMR** represents a diverse membership that bridges basic and patient-oriented research in multiple medical disciplines. Members are scientists engaged in original clinical and laboratory medical research.

**Our Mission:** To develop and mentor tomorrow's leaders in medical research

### Past Members

- Anthony S. Fauci, Director/NIH-NIAID (AFMR President/1980-1981)
- **Nobel Prize Winners** — Robert J. Lefkowitz (2012), Bruce A. Beutler (2011), Barry Marshall (2005) Ferid Murad (1998), Joseph E. Murray (1990), Michael S. Brown & Joseph L. Goldstein (1985)

### Membership Includes

- AFMR National + a Regional Section — Eastern/Midwestern/Southern/Western

### Membership Categories

- **Individual** (Active/Associate/Student)
- **Departmental/Group** (Two tiers: Up to five; 6 -10)

**Become a Member Today**  
[afmr.org/membership](http://afmr.org/membership)

## Benefits of Membership

- **Publication subscriptions**
  - *Journal of Investigative Medicine (JIM)* — A PubMed journal (Impact factor: 2.304)
  - *Journal of Investigative Medicine-High Impact Case Reports (JIM-HICR)*
  - Members are encouraged to submit their research.
    - No page charges for manuscripts accepted to *JIM*.
    - Fifty (50) percent discount on case reports published in *JIM-HICR*.
- **Meetings**
  - Reduced rates for AFMR regional and annual national (Translational Science, Experimental Biology) meetings.
  - Opportunities to network, present abstracts and cases, earn CME credits.
- **Awards**
  - National: Outstanding Investigator and Junior Physician-Investigator Awards
  - Regional: Henry Christian Awards
- **Virtual Education Portal**
  - Virtual Education Series: Symposia & Workshops
  - Podcasts from AFMR & *The Journal of Investigative Medicine*
- **Become a Mentor/Receive Mentorship**
- **National & Regional Leadership Opportunities**
- **Advocacy**
  - Via partnership in the Federation of American Societies for Experimental Biology (FASEB) & Research!America.
- **Monthly Newsletter**

Connect with AFMR on Social Media   @AFMRResearch @JIM\_AFMR

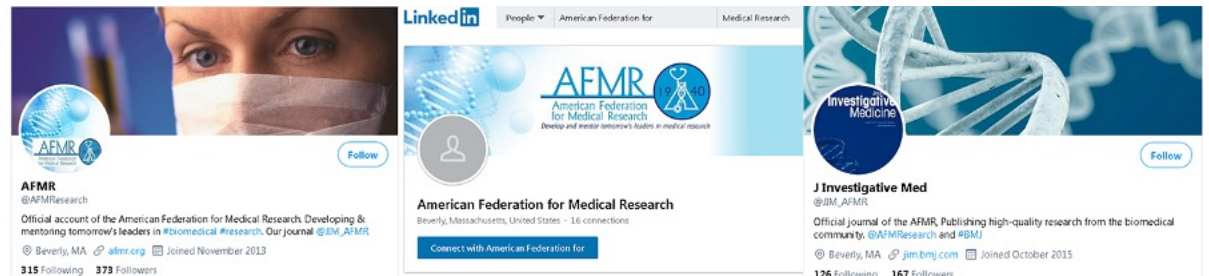

Supplement: AFMR_Membership_Flyer_70_5.pdf [file AFMR_Membership_Flyer_70_5.pdf]
